# Supplementary material
Source: Springer Nature journal article supplement (https://www.springermedizin.de/resource/supplementary/13037_2010_89_MOESM5_ESM.pdf/9659348)
Supplement: MOESM5 [file 9659348]

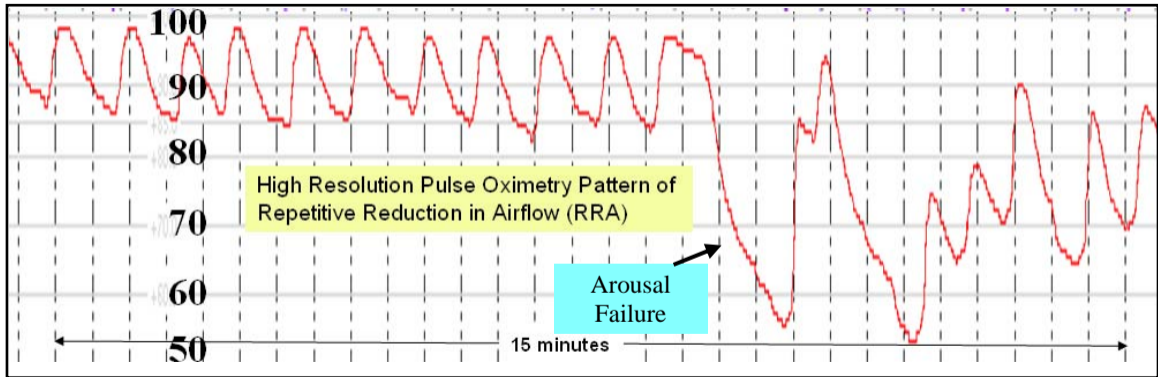

High Resolution Pulse Oximetry Pattern of Repetitive Reduction in Airflow (RRA)

Arousal Failure

15 minutes
